# Supplementary material for: Emergency department front-end split-flow experience: ‘physician in intake’
Source: PubMed Central journal article supplement — BMJ Open Qual. 2019 Nov 18;8(4):e000817. doi: 10.1136/bmjoq-2019-000817 (PMC6863656; doi:10.1136/bmjoq-2019-000817), 2019-11-18
Supplement: bmjoq-2019-000817supp001.pdf [file bmjoq-2019-000817supp001.pdf]

## Supplemental Material: Data dictionary

| Variable / Field Name      | Field Label<br><i>Field Note</i>                                                                                                                                                                    | Field Attributes (Field Type, Validation, Choices, Calculations, etc.)                                                                                      |   |          |   |           |   |         |
|----------------------------|-----------------------------------------------------------------------------------------------------------------------------------------------------------------------------------------------------|-------------------------------------------------------------------------------------------------------------------------------------------------------------|---|----------|---|-----------|---|---------|
| ed_volume                  | Annual ED patient volume                                                                                                                                                                            | text (integer, Min: 0)                                                                                                                                      |   |          |   |           |   |         |
| number_adult_patients      | Annual number of adult patients (18 or older)                                                                                                                                                       | text (integer, Min: 0)                                                                                                                                      |   |          |   |           |   |         |
| number_female_patients     | Annual number of women patients                                                                                                                                                                     | text (integer, Min: 0)                                                                                                                                      |   |          |   |           |   |         |
| median_patient_age         | Median patient age                                                                                                                                                                                  | text (number, Min: 0)                                                                                                                                       |   |          |   |           |   |         |
| hospital_admission_rate    | Annual hospital admission rate (%)<br><i>Number of ED patients admitted to hospital including observation status and ICU (but excluding ED observation care), divided by total annual ED volume</i> | text (number, Min: 0, Max: 100.0)                                                                                                                           |   |          |   |           |   |         |
| transfer_rate              | Annual transfer rate (%)<br><i>Number of patients transferred out of ED to other facilities, divided by total annual ED volume</i>                                                                  | text (number, Min: 0, Max: 100)                                                                                                                             |   |          |   |           |   |         |
| separate_peds_workflow     | Does a separate workflow exist for pediatric patients?                                                                                                                                              | yesno<br><table border="1"> <tr> <td>1</td> <td>Yes</td> </tr> <tr> <td>0</td> <td>No</td> </tr> </table>                                                   | 1 | Yes      | 0 | No        |   |         |
| 1                          | Yes                                                                                                                                                                                                 |                                                                                                                                                             |   |          |   |           |   |         |
| 0                          | No                                                                                                                                                                                                  |                                                                                                                                                             |   |          |   |           |   |         |
| peds_workflow_description  | Please briefly describe the pediatric patient workflow<br>Show the field ONLY if: [separate_peds_workflow] = '1'                                                                                    | notes                                                                                                                                                       |   |          |   |           |   |         |
| ed_setting                 | ED Setting                                                                                                                                                                                          | radio<br><table border="1"> <tr> <td>1</td> <td>Urban</td> </tr> <tr> <td>2</td> <td>Suburban</td> </tr> <tr> <td>3</td> <td>Rural</td> </tr> </table>      | 1 | Urban    | 2 | Suburban  | 3 | Rural   |
| 1                          | Urban                                                                                                                                                                                               |                                                                                                                                                             |   |          |   |           |   |         |
| 2                          | Suburban                                                                                                                                                                                            |                                                                                                                                                             |   |          |   |           |   |         |
| 3                          | Rural                                                                                                                                                                                               |                                                                                                                                                             |   |          |   |           |   |         |
| ed_educational_affiliation | ED Educational Affiliation                                                                                                                                                                          | radio<br><table border="1"> <tr> <td>1</td> <td>Academic</td> </tr> <tr> <td>2</td> <td>Community</td> </tr> <tr> <td>3</td> <td>Hybrid</td> </tr> </table> | 1 | Academic | 2 | Community | 3 | Hybrid  |
| 1                          | Academic                                                                                                                                                                                            |                                                                                                                                                             |   |          |   |           |   |         |
| 2                          | Community                                                                                                                                                                                           |                                                                                                                                                             |   |          |   |           |   |         |
| 3                          | Hybrid                                                                                                                                                                                              |                                                                                                                                                             |   |          |   |           |   |         |
| trauma_center_designation  | Hospital trauma center designation                                                                                                                                                                  | radio<br><table border="1"> <tr> <td>1</td> <td>Level 1</td> </tr> <tr> <td>2</td> <td>Level 2</td> </tr> <tr> <td>3</td> <td>Level 3</td> </tr> </table>   | 1 | Level 1  | 2 | Level 2   | 3 | Level 3 |
| 1                          | Level 1                                                                                                                                                                                             |                                                                                                                                                             |   |          |   |           |   |         |
| 2                          | Level 2                                                                                                                                                                                             |                                                                                                                                                             |   |          |   |           |   |         |
| 3                          | Level 3                                                                                                                                                                                             |                                                                                                                                                             |   |          |   |           |   |         |

|                                                                                     |                                                                                                                                                              |                                                                                                                                                                                                                                                                                                                                                                                                                                                                                                                                                                                                                              |   |                         |      |                       |                         |             |   |                         |         |   |                         |          |   |                         |                      |   |                         |                       |   |                         |                                         |
|-------------------------------------------------------------------------------------|--------------------------------------------------------------------------------------------------------------------------------------------------------------|------------------------------------------------------------------------------------------------------------------------------------------------------------------------------------------------------------------------------------------------------------------------------------------------------------------------------------------------------------------------------------------------------------------------------------------------------------------------------------------------------------------------------------------------------------------------------------------------------------------------------|---|-------------------------|------|-----------------------|-------------------------|-------------|---|-------------------------|---------|---|-------------------------|----------|---|-------------------------|----------------------|---|-------------------------|-----------------------|---|-------------------------|-----------------------------------------|
|                                                                                     |                                                                                                                                                              | <table border="1"> <tr> <td>4</td> <td>Other</td> </tr> <tr> <td>5</td> <td>No trauma designation</td> </tr> </table>                                                                                                                                                                                                                                                                                                                                                                                                                                                                                                        | 4 | Other                   | 5    | No trauma designation |                         |             |   |                         |         |   |                         |          |   |                         |                      |   |                         |                       |   |                         |                                         |
| 4                                                                                   | Other                                                                                                                                                        |                                                                                                                                                                                                                                                                                                                                                                                                                                                                                                                                                                                                                              |   |                         |      |                       |                         |             |   |                         |         |   |                         |          |   |                         |                      |   |                         |                       |   |                         |                                         |
| 5                                                                                   | No trauma designation                                                                                                                                        |                                                                                                                                                                                                                                                                                                                                                                                                                                                                                                                                                                                                                              |   |                         |      |                       |                         |             |   |                         |         |   |                         |          |   |                         |                      |   |                         |                       |   |                         |                                         |
| observation_unit                                                                    | Does this ED have an observation unit?                                                                                                                       | yesno<br><table border="1"> <tr> <td>1</td> <td>Yes</td> </tr> <tr> <td>0</td> <td>No</td> </tr> </table>                                                                                                                                                                                                                                                                                                                                                                                                                                                                                                                    | 1 | Yes                     | 0    | No                    |                         |             |   |                         |         |   |                         |          |   |                         |                      |   |                         |                       |   |                         |                                         |
| 1                                                                                   | Yes                                                                                                                                                          |                                                                                                                                                                                                                                                                                                                                                                                                                                                                                                                                                                                                                              |   |                         |      |                       |                         |             |   |                         |         |   |                         |          |   |                         |                      |   |                         |                       |   |                         |                                         |
| 0                                                                                   | No                                                                                                                                                           |                                                                                                                                                                                                                                                                                                                                                                                                                                                                                                                                                                                                                              |   |                         |      |                       |                         |             |   |                         |         |   |                         |          |   |                         |                      |   |                         |                       |   |                         |                                         |
| obs_unit_location<br>Show the field ONLY if: [observation_unit] = '1'               | Is the observation unit physically located in the ED?                                                                                                        | yesno<br><table border="1"> <tr> <td>1</td> <td>Yes</td> </tr> <tr> <td>0</td> <td>No</td> </tr> </table>                                                                                                                                                                                                                                                                                                                                                                                                                                                                                                                    | 1 | Yes                     | 0    | No                    |                         |             |   |                         |         |   |                         |          |   |                         |                      |   |                         |                       |   |                         |                                         |
| 1                                                                                   | Yes                                                                                                                                                          |                                                                                                                                                                                                                                                                                                                                                                                                                                                                                                                                                                                                                              |   |                         |      |                       |                         |             |   |                         |         |   |                         |          |   |                         |                      |   |                         |                       |   |                         |                                         |
| 0                                                                                   | No                                                                                                                                                           |                                                                                                                                                                                                                                                                                                                                                                                                                                                                                                                                                                                                                              |   |                         |      |                       |                         |             |   |                         |         |   |                         |          |   |                         |                      |   |                         |                       |   |                         |                                         |
| number_observation_beds<br>Show the field ONLY if: [observation_unit] = '1'         | How many beds does the observation unit have?                                                                                                                | text (integer, Min: 0)                                                                                                                                                                                                                                                                                                                                                                                                                                                                                                                                                                                                       |   |                         |      |                       |                         |             |   |                         |         |   |                         |          |   |                         |                      |   |                         |                       |   |                         |                                         |
| intake_process_exists                                                               | Section<br>Header: <i>Description of Front End Process</i><br><br>Has this ED implemented a new front end process to replace traditional nurse-based triage? | yesno<br><table border="1"> <tr> <td>1</td> <td>Yes</td> </tr> <tr> <td>0</td> <td>No</td> </tr> </table>                                                                                                                                                                                                                                                                                                                                                                                                                                                                                                                    | 1 | Yes                     | 0    | No                    |                         |             |   |                         |         |   |                         |          |   |                         |                      |   |                         |                       |   |                         |                                         |
| 1                                                                                   | Yes                                                                                                                                                          |                                                                                                                                                                                                                                                                                                                                                                                                                                                                                                                                                                                                                              |   |                         |      |                       |                         |             |   |                         |         |   |                         |          |   |                         |                      |   |                         |                       |   |                         |                                         |
| 0                                                                                   | No                                                                                                                                                           |                                                                                                                                                                                                                                                                                                                                                                                                                                                                                                                                                                                                                              |   |                         |      |                       |                         |             |   |                         |         |   |                         |          |   |                         |                      |   |                         |                       |   |                         |                                         |
| prior_process_description                                                           | Was your old front end process anything other than nurse-based triage? If yes, please describe.                                                              | notes                                                                                                                                                                                                                                                                                                                                                                                                                                                                                                                                                                                                                        |   |                         |      |                       |                         |             |   |                         |         |   |                         |          |   |                         |                      |   |                         |                       |   |                         |                                         |
| intake_start_date                                                                   | On what date was a new front end process implemented in this ED?                                                                                             | text (date_mdy)                                                                                                                                                                                                                                                                                                                                                                                                                                                                                                                                                                                                              |   |                         |      |                       |                         |             |   |                         |         |   |                         |          |   |                         |                      |   |                         |                       |   |                         |                                         |
| intake_hours                                                                        | Please describe which hours and days of the week that the new front end process is in operation.                                                             | notes                                                                                                                                                                                                                                                                                                                                                                                                                                                                                                                                                                                                                        |   |                         |      |                       |                         |             |   |                         |         |   |                         |          |   |                         |                      |   |                         |                       |   |                         |                                         |
| front_end_activities                                                                | What activities are performed in your new front end process?                                                                                                 | checkbox<br><table border="1"> <tr> <td>1</td> <td>front_end_activities__1</td> <td>Labs</td> </tr> <tr> <td>2</td> <td>front_end_activities__2</td> <td>Medications</td> </tr> <tr> <td>3</td> <td>front_end_activities__3</td> <td>Imaging</td> </tr> <tr> <td>4</td> <td>front_end_activities__4</td> <td>Consults</td> </tr> <tr> <td>5</td> <td>front_end_activities__5</td> <td>ESI Level Assignment</td> </tr> <tr> <td>6</td> <td>front_end_activities__6</td> <td>Discharge Disposition</td> </tr> <tr> <td>7</td> <td>front_end_activities__7</td> <td>Other (Please describe in answer below)</td> </tr> </table> | 1 | front_end_activities__1 | Labs | 2                     | front_end_activities__2 | Medications | 3 | front_end_activities__3 | Imaging | 4 | front_end_activities__4 | Consults | 5 | front_end_activities__5 | ESI Level Assignment | 6 | front_end_activities__6 | Discharge Disposition | 7 | front_end_activities__7 | Other (Please describe in answer below) |
| 1                                                                                   | front_end_activities__1                                                                                                                                      | Labs                                                                                                                                                                                                                                                                                                                                                                                                                                                                                                                                                                                                                         |   |                         |      |                       |                         |             |   |                         |         |   |                         |          |   |                         |                      |   |                         |                       |   |                         |                                         |
| 2                                                                                   | front_end_activities__2                                                                                                                                      | Medications                                                                                                                                                                                                                                                                                                                                                                                                                                                                                                                                                                                                                  |   |                         |      |                       |                         |             |   |                         |         |   |                         |          |   |                         |                      |   |                         |                       |   |                         |                                         |
| 3                                                                                   | front_end_activities__3                                                                                                                                      | Imaging                                                                                                                                                                                                                                                                                                                                                                                                                                                                                                                                                                                                                      |   |                         |      |                       |                         |             |   |                         |         |   |                         |          |   |                         |                      |   |                         |                       |   |                         |                                         |
| 4                                                                                   | front_end_activities__4                                                                                                                                      | Consults                                                                                                                                                                                                                                                                                                                                                                                                                                                                                                                                                                                                                     |   |                         |      |                       |                         |             |   |                         |         |   |                         |          |   |                         |                      |   |                         |                       |   |                         |                                         |
| 5                                                                                   | front_end_activities__5                                                                                                                                      | ESI Level Assignment                                                                                                                                                                                                                                                                                                                                                                                                                                                                                                                                                                                                         |   |                         |      |                       |                         |             |   |                         |         |   |                         |          |   |                         |                      |   |                         |                       |   |                         |                                         |
| 6                                                                                   | front_end_activities__6                                                                                                                                      | Discharge Disposition                                                                                                                                                                                                                                                                                                                                                                                                                                                                                                                                                                                                        |   |                         |      |                       |                         |             |   |                         |         |   |                         |          |   |                         |                      |   |                         |                       |   |                         |                                         |
| 7                                                                                   | front_end_activities__7                                                                                                                                      | Other (Please describe in answer below)                                                                                                                                                                                                                                                                                                                                                                                                                                                                                                                                                                                      |   |                         |      |                       |                         |             |   |                         |         |   |                         |          |   |                         |                      |   |                         |                       |   |                         |                                         |
| other_front_end_activity<br>Show the field ONLY if: [front_end_activities(7)] = '1' | Please describe which other activity is performed in your front end process                                                                                  | notes                                                                                                                                                                                                                                                                                                                                                                                                                                                                                                                                                                                                                        |   |                         |      |                       |                         |             |   |                         |         |   |                         |          |   |                         |                      |   |                         |                       |   |                         |                                         |
| front_end_exclusions                                                                | Which types of patients are EXCLUDED from                                                                                                                    | checkbox                                                                                                                                                                                                                                                                                                                                                                                                                                                                                                                                                                                                                     |   |                         |      |                       |                         |             |   |                         |         |   |                         |          |   |                         |                      |   |                         |                       |   |                         |                                         |

|                                                                                         |                                                                                                          |                                                                                                                                                                                                                                                                                                                                                                                                                                                                                                                                                                                                                                                                                                                                                                |   |                         |              |   |                         |                        |   |                         |                      |   |                         |                                         |   |                         |                   |   |                    |      |   |                    |          |   |                    |           |   |                    |          |    |                     |                                         |
|-----------------------------------------------------------------------------------------|----------------------------------------------------------------------------------------------------------|----------------------------------------------------------------------------------------------------------------------------------------------------------------------------------------------------------------------------------------------------------------------------------------------------------------------------------------------------------------------------------------------------------------------------------------------------------------------------------------------------------------------------------------------------------------------------------------------------------------------------------------------------------------------------------------------------------------------------------------------------------------|---|-------------------------|--------------|---|-------------------------|------------------------|---|-------------------------|----------------------|---|-------------------------|-----------------------------------------|---|-------------------------|-------------------|---|--------------------|------|---|--------------------|----------|---|--------------------|-----------|---|--------------------|----------|----|---------------------|-----------------------------------------|
|                                                                                         | your front end process, if any?                                                                          | <table border="1"> <tr> <td>1</td> <td>front_end_exclusions__1</td> <td>EMS arrivals</td> </tr> <tr> <td>2</td> <td>front_end_exclusions__2</td> <td>Vital sign instability</td> </tr> <tr> <td>3</td> <td>front_end_exclusions__3</td> <td>Non-English speakers</td> </tr> <tr> <td>4</td> <td>front_end_exclusions__4</td> <td>Other (please describe in answer below)</td> </tr> <tr> <td>5</td> <td>front_end_exclusions__5</td> <td>None of the above</td> </tr> </table>                                                                                                                                                                                                                                                                                 | 1 | front_end_exclusions__1 | EMS arrivals | 2 | front_end_exclusions__2 | Vital sign instability | 3 | front_end_exclusions__3 | Non-English speakers | 4 | front_end_exclusions__4 | Other (please describe in answer below) | 5 | front_end_exclusions__5 | None of the above |   |                    |      |   |                    |          |   |                    |           |   |                    |          |    |                     |                                         |
| 1                                                                                       | front_end_exclusions__1                                                                                  | EMS arrivals                                                                                                                                                                                                                                                                                                                                                                                                                                                                                                                                                                                                                                                                                                                                                   |   |                         |              |   |                         |                        |   |                         |                      |   |                         |                                         |   |                         |                   |   |                    |      |   |                    |          |   |                    |           |   |                    |          |    |                     |                                         |
| 2                                                                                       | front_end_exclusions__2                                                                                  | Vital sign instability                                                                                                                                                                                                                                                                                                                                                                                                                                                                                                                                                                                                                                                                                                                                         |   |                         |              |   |                         |                        |   |                         |                      |   |                         |                                         |   |                         |                   |   |                    |      |   |                    |          |   |                    |           |   |                    |          |    |                     |                                         |
| 3                                                                                       | front_end_exclusions__3                                                                                  | Non-English speakers                                                                                                                                                                                                                                                                                                                                                                                                                                                                                                                                                                                                                                                                                                                                           |   |                         |              |   |                         |                        |   |                         |                      |   |                         |                                         |   |                         |                   |   |                    |      |   |                    |          |   |                    |           |   |                    |          |    |                     |                                         |
| 4                                                                                       | front_end_exclusions__4                                                                                  | Other (please describe in answer below)                                                                                                                                                                                                                                                                                                                                                                                                                                                                                                                                                                                                                                                                                                                        |   |                         |              |   |                         |                        |   |                         |                      |   |                         |                                         |   |                         |                   |   |                    |      |   |                    |          |   |                    |           |   |                    |          |    |                     |                                         |
| 5                                                                                       | front_end_exclusions__5                                                                                  | None of the above                                                                                                                                                                                                                                                                                                                                                                                                                                                                                                                                                                                                                                                                                                                                              |   |                         |              |   |                         |                        |   |                         |                      |   |                         |                                         |   |                         |                   |   |                    |      |   |                    |          |   |                    |           |   |                    |          |    |                     |                                         |
| front_end_exclusion_other<br>Show the field ONLY if:<br>[front_end_exclusions(4)] = '1' | Please describe which other criteria are EXCLUDED from the front end process                             | notes                                                                                                                                                                                                                                                                                                                                                                                                                                                                                                                                                                                                                                                                                                                                                          |   |                         |              |   |                         |                        |   |                         |                      |   |                         |                                         |   |                         |                   |   |                    |      |   |                    |          |   |                    |           |   |                    |          |    |                     |                                         |
| front_end_staff                                                                         | Who staffs your front end process?                                                                       | checkbox <table border="1"> <tr> <td>1</td> <td>front_end_staff__1</td> <td>Attending</td> </tr> <tr> <td>2</td> <td>front_end_staff__2</td> <td>APP</td> </tr> <tr> <td>3</td> <td>front_end_staff__3</td> <td>Resident</td> </tr> <tr> <td>4</td> <td>front_end_staff__4</td> <td>Scribe</td> </tr> <tr> <td>5</td> <td>front_end_staff__5</td> <td>RN</td> </tr> <tr> <td>6</td> <td>front_end_staff__6</td> <td>Tech</td> </tr> <tr> <td>7</td> <td>front_end_staff__7</td> <td>EKG Tech</td> </tr> <tr> <td>8</td> <td>front_end_staff__8</td> <td>Registrar</td> </tr> <tr> <td>9</td> <td>front_end_staff__9</td> <td>Security</td> </tr> <tr> <td>10</td> <td>front_end_staff__10</td> <td>Other (please describe in answer below)</td> </tr> </table> | 1 | front_end_staff__1      | Attending    | 2 | front_end_staff__2      | APP                    | 3 | front_end_staff__3      | Resident             | 4 | front_end_staff__4      | Scribe                                  | 5 | front_end_staff__5      | RN                | 6 | front_end_staff__6 | Tech | 7 | front_end_staff__7 | EKG Tech | 8 | front_end_staff__8 | Registrar | 9 | front_end_staff__9 | Security | 10 | front_end_staff__10 | Other (please describe in answer below) |
| 1                                                                                       | front_end_staff__1                                                                                       | Attending                                                                                                                                                                                                                                                                                                                                                                                                                                                                                                                                                                                                                                                                                                                                                      |   |                         |              |   |                         |                        |   |                         |                      |   |                         |                                         |   |                         |                   |   |                    |      |   |                    |          |   |                    |           |   |                    |          |    |                     |                                         |
| 2                                                                                       | front_end_staff__2                                                                                       | APP                                                                                                                                                                                                                                                                                                                                                                                                                                                                                                                                                                                                                                                                                                                                                            |   |                         |              |   |                         |                        |   |                         |                      |   |                         |                                         |   |                         |                   |   |                    |      |   |                    |          |   |                    |           |   |                    |          |    |                     |                                         |
| 3                                                                                       | front_end_staff__3                                                                                       | Resident                                                                                                                                                                                                                                                                                                                                                                                                                                                                                                                                                                                                                                                                                                                                                       |   |                         |              |   |                         |                        |   |                         |                      |   |                         |                                         |   |                         |                   |   |                    |      |   |                    |          |   |                    |           |   |                    |          |    |                     |                                         |
| 4                                                                                       | front_end_staff__4                                                                                       | Scribe                                                                                                                                                                                                                                                                                                                                                                                                                                                                                                                                                                                                                                                                                                                                                         |   |                         |              |   |                         |                        |   |                         |                      |   |                         |                                         |   |                         |                   |   |                    |      |   |                    |          |   |                    |           |   |                    |          |    |                     |                                         |
| 5                                                                                       | front_end_staff__5                                                                                       | RN                                                                                                                                                                                                                                                                                                                                                                                                                                                                                                                                                                                                                                                                                                                                                             |   |                         |              |   |                         |                        |   |                         |                      |   |                         |                                         |   |                         |                   |   |                    |      |   |                    |          |   |                    |           |   |                    |          |    |                     |                                         |
| 6                                                                                       | front_end_staff__6                                                                                       | Tech                                                                                                                                                                                                                                                                                                                                                                                                                                                                                                                                                                                                                                                                                                                                                           |   |                         |              |   |                         |                        |   |                         |                      |   |                         |                                         |   |                         |                   |   |                    |      |   |                    |          |   |                    |           |   |                    |          |    |                     |                                         |
| 7                                                                                       | front_end_staff__7                                                                                       | EKG Tech                                                                                                                                                                                                                                                                                                                                                                                                                                                                                                                                                                                                                                                                                                                                                       |   |                         |              |   |                         |                        |   |                         |                      |   |                         |                                         |   |                         |                   |   |                    |      |   |                    |          |   |                    |           |   |                    |          |    |                     |                                         |
| 8                                                                                       | front_end_staff__8                                                                                       | Registrar                                                                                                                                                                                                                                                                                                                                                                                                                                                                                                                                                                                                                                                                                                                                                      |   |                         |              |   |                         |                        |   |                         |                      |   |                         |                                         |   |                         |                   |   |                    |      |   |                    |          |   |                    |           |   |                    |          |    |                     |                                         |
| 9                                                                                       | front_end_staff__9                                                                                       | Security                                                                                                                                                                                                                                                                                                                                                                                                                                                                                                                                                                                                                                                                                                                                                       |   |                         |              |   |                         |                        |   |                         |                      |   |                         |                                         |   |                         |                   |   |                    |      |   |                    |          |   |                    |           |   |                    |          |    |                     |                                         |
| 10                                                                                      | front_end_staff__10                                                                                      | Other (please describe in answer below)                                                                                                                                                                                                                                                                                                                                                                                                                                                                                                                                                                                                                                                                                                                        |   |                         |              |   |                         |                        |   |                         |                      |   |                         |                                         |   |                         |                   |   |                    |      |   |                    |          |   |                    |           |   |                    |          |    |                     |                                         |
| front_end_staff_other<br>Show the field ONLY if:<br>[front_end_staff(10)] = '1'         | Please describe which other staff are involved in the front end process                                  | notes                                                                                                                                                                                                                                                                                                                                                                                                                                                                                                                                                                                                                                                                                                                                                          |   |                         |              |   |                         |                        |   |                         |                      |   |                         |                                         |   |                         |                   |   |                    |      |   |                    |          |   |                    |           |   |                    |          |    |                     |                                         |
| front_end_treatment_spaces                                                              | How many treatment spaces are available in your front end process?                                       | text (integer, Min: 0)                                                                                                                                                                                                                                                                                                                                                                                                                                                                                                                                                                                                                                                                                                                                         |   |                         |              |   |                         |                        |   |                         |                      |   |                         |                                         |   |                         |                   |   |                    |      |   |                    |          |   |                    |           |   |                    |          |    |                     |                                         |
| front_end_spaces_description                                                            | Please describe the treatment spaces in your front end process.                                          | notes                                                                                                                                                                                                                                                                                                                                                                                                                                                                                                                                                                                                                                                                                                                                                          |   |                         |              |   |                         |                        |   |                         |                      |   |                         |                                         |   |                         |                   |   |                    |      |   |                    |          |   |                    |           |   |                    |          |    |                     |                                         |
| surge_plan                                                                              | Do you have a surge plan for the front end process? If so, please describe.                              | notes                                                                                                                                                                                                                                                                                                                                                                                                                                                                                                                                                                                                                                                                                                                                                          |   |                         |              |   |                         |                        |   |                         |                      |   |                         |                                         |   |                         |                   |   |                    |      |   |                    |          |   |                    |           |   |                    |          |    |                     |                                         |
| impact_of_intake                                                                        | Did your visit to the University of Colorado/UCHealth impact your ED's front-end operations? If so, how? | notes                                                                                                                                                                                                                                                                                                                                                                                                                                                                                                                                                                                                                                                                                                                                                          |   |                         |              |   |                         |                        |   |                         |                      |   |                         |                                         |   |                         |                   |   |                    |      |   |                    |          |   |                    |           |   |                    |          |    |                     |                                         |
| quality_monitoring_processes                                                            | Do you have a structured quality monitoring program for your front end process? If yes, please describe. | notes                                                                                                                                                                                                                                                                                                                                                                                                                                                                                                                                                                                                                                                                                                                                                          |   |                         |              |   |                         |                        |   |                         |                      |   |                         |                                         |   |                         |                   |   |                    |      |   |                    |          |   |                    |           |   |                    |          |    |                     |                                         |

|                          |                                                                                                                                                                                                                                                                                                                                                                                                                                                                                                                                    |                                                                                                                                                                                                    |
|--------------------------|------------------------------------------------------------------------------------------------------------------------------------------------------------------------------------------------------------------------------------------------------------------------------------------------------------------------------------------------------------------------------------------------------------------------------------------------------------------------------------------------------------------------------------|----------------------------------------------------------------------------------------------------------------------------------------------------------------------------------------------------|
| arrival_to_provider_pre  | <p>Section Header: <i>Pre- and Post-Implementation ED Metrics In this section, we seek to understand changes in metrics before and after new front end processes. Please use standardized metrics as defined here by the ED Benchmarking Alliance.</i></p> <p>Median arrival-to-provider time (in minutes) PRIOR to new front end process (i.e. "Door to Doc" time)<br/><i>First documented date and time the patient arrived in the ED until documented date and time of first contact with a physician/APRN/PA in the ED</i></p> | <p>text (number, Min: 0)<br/>Field Annotation: First documented date and time the patient arrived in the ED until documented date and time of first contact with a physician/APRN/PA in the ED</p> |
| arrival_to_provider_post | <p>Median arrival-to-provider time (in minutes) AFTER new front end process (i.e. "Door to Doc" time)<br/><i>First documented date and time the patient arrived in the ED until documented date and time of first contact with a physician/APRN/PA in the ED</i></p>                                                                                                                                                                                                                                                               | <p>text (number, Min: 0)<br/>Field Annotation: First documented date and time the patient arrived in the ED until documented date and time of first contact with a physician/APRN/PA in the ED</p> |
| median_los_all_pre       | <p>Median ED length of stay (in minutes) for all patients PRIOR to new front end process<br/><i>First documented date and time the patient arrived in the ED until documented date and time of the patient's physical departure from the ED</i></p>                                                                                                                                                                                                                                                                                | <p>text (number, Min: 0)<br/>Field Annotation: First documented date and time the patient arrived in the ED until documented date and time of the patient's physical departure from the ED</p>     |
| median_los_all_post      | <p>Median ED length of stay (in minutes) for all patients AFTER new front end process<br/><i>First documented date and time the patient arrived in the ED until documented date and time of the patient's physical departure from the ED</i></p>                                                                                                                                                                                                                                                                                   | <p>text (number, Min: 0)<br/>Field Annotation: First documented date and time the patient arrived in the ED until documented date and time of the patient's physical departure from the ED</p>     |

|                        |                                                                                                                                                                                                                                                                                              |                                                                                                                                                                                        |
|------------------------|----------------------------------------------------------------------------------------------------------------------------------------------------------------------------------------------------------------------------------------------------------------------------------------------|----------------------------------------------------------------------------------------------------------------------------------------------------------------------------------------|
| median_los_walkin_pre  | Median ED length of stay (in minutes) for ONLY front end patients PRIOR to new front end process<br><i>First documented date and time the patient arrived in the ED until documented date and time of the patient's physical departure from the ED</i>                                       | text (number, Min: 0)<br>Field Annotation: First documented date and time the patient arrived in the ED until documented date and time of the patient's physical departure from the ED |
| median_los_walkin_post | Median length of stay (in minutes) for ONLY front end patients AFTER new front end process<br><i>First documented date and time the patient arrived in the ED until documented date and time of the patient's physical departure from the ED</i>                                             | text (number, Min: 0)<br>Field Annotation: First documented date and time the patient arrived in the ED until documented date and time of the patient's physical departure from the ED |
| median_dc_los_pre      | Median length of stay (LOS) for patients discharged from ED PRIOR to new front end process (EXCLUDING patients in observation status)<br><i>First documented date and time the patient arrived in the ED until documented date and time of the patient's physical departure from the ED.</i> | text (number, Min: 0)                                                                                                                                                                  |
| median_dc_los_post     | Median length of stay (LOS) for patients discharged from ED AFTER new front end process (EXCLUDING patients in observation status)<br><i>First documented date and time the patient arrived in the ED until documented date and time of the patient's physical departure from the ED.</i>    | text (number, Min: 0)                                                                                                                                                                  |
| median_admit_los_pre   | Median length of stay (LOS) for admitted patients PRIOR to new front end process                                                                                                                                                                                                             | text (number, Min: 0)                                                                                                                                                                  |

|                       |                                                                                                                                                                                                                                                                                                                                                                                                                                                                                                                                                      |                                                                                                                                                                                                                                                                                                                                                                                                                                                                                                               |
|-----------------------|------------------------------------------------------------------------------------------------------------------------------------------------------------------------------------------------------------------------------------------------------------------------------------------------------------------------------------------------------------------------------------------------------------------------------------------------------------------------------------------------------------------------------------------------------|---------------------------------------------------------------------------------------------------------------------------------------------------------------------------------------------------------------------------------------------------------------------------------------------------------------------------------------------------------------------------------------------------------------------------------------------------------------------------------------------------------------|
|                       | (EXCLUDING patients in observation status)<br><i>First documented date and time the patient arrived in the ED until documented date and time of the patient's physical departure from the ED.</i>                                                                                                                                                                                                                                                                                                                                                    |                                                                                                                                                                                                                                                                                                                                                                                                                                                                                                               |
| median_admit_los_post | Median length of stay (LOS) for admitted patients AFTER new front end process (EXCLUDING patients in observation status)<br><i>First documented date and time the patient arrived in the ED until documented date and time of the patient's physical departure from the ED.</i>                                                                                                                                                                                                                                                                      | text (number, Min: 0)                                                                                                                                                                                                                                                                                                                                                                                                                                                                                         |
| lbbs_pre              | Overall left before being seen (LBBS) rates (in %) PRIOR to new front end process<br><i>Total number of patients who leave the ED before examination by a physician/APRN/PA, divided by the total number of patients who presented to the same ED during a defined time period. Which provider completes the patient's initial assessment is governed by law and hospital bylaws. It will vary by site. LBBS includes patients who complete the triage process. LBBS patients may or may not have received initial treatment and/or diagnostics.</i> | text (number, Min: 0, Max: 100)<br>Field Annotation: Total number of patients who leave the ED before examination by a physician/APRN/PA, divided by the total number of patients who presented to the same ED during a defined time period. Which provider completes the patient's initial assessment is governed by law and hospital bylaws. It will vary by site. LBBS includes patients who complete the triage process. LBBS patients may or may not have received initial treatment and/or diagnostics. |
| lbbs_post             | Overall left before being seen (LBBS) rates (in %) AFTER new front end process<br><i>Total number of patients who leave the ED before examination by a physician/APRN/PA, divided by the total number of patients who</i>                                                                                                                                                                                                                                                                                                                            | text (number, Min: 0, Max: 100)<br>Field Annotation: Total number of patients who leave the ED before examination by a physician/APRN/PA, divided by the total number of patients who presented to the same ED during a defined time period. Which provider completes the patient's initial assessment is governed by law and hospital bylaws. It will vary by site. LBBS includes patients who complete the triage process. LBBS patients may or may not have received initial treatment and/or diagnostics. |

|                          |                                                                                                                                                                                                                                                                                                                                                                                                                                                                                                                                                                                       |                                                                                                                                                                                                                                                                                                                                                                                                                                                                                                                                |
|--------------------------|---------------------------------------------------------------------------------------------------------------------------------------------------------------------------------------------------------------------------------------------------------------------------------------------------------------------------------------------------------------------------------------------------------------------------------------------------------------------------------------------------------------------------------------------------------------------------------------|--------------------------------------------------------------------------------------------------------------------------------------------------------------------------------------------------------------------------------------------------------------------------------------------------------------------------------------------------------------------------------------------------------------------------------------------------------------------------------------------------------------------------------|
|                          | <p><i>presented to the same ED during a defined time period. Which provider completes the patient's initial assessment is governed by law and hospital bylaws. It will vary by site. LBBS includes patients who complete the triage process. LBBS patients may or may not have received initial treatment and/or diagnostics.</i></p>                                                                                                                                                                                                                                                 |                                                                                                                                                                                                                                                                                                                                                                                                                                                                                                                                |
| lbbs_during_intake_hours | <p><b>Overall left before being seen (LBBS) rates (in %) during hours of new front end process operation</b><br/> <i>Total number of patients who leave the ED before examination by a physician/APRN/PA, divided by the total number of patients who presented to the same ED during a defined time period. Which provider completes the patient's initial assessment is governed by law and hospital bylaws. It will vary by site. LBBS includes patients who complete the triage process. LBBS patients may or may not have received initial treatment and/or diagnostics.</i></p> | <p>text (number, Min: 0, Max: 100)<br/>         Field Annotation: Total number of patients who leave the ED before examination by a physician/APRN/PA, divided by the total number of patients who presented to the same ED during a defined time period. Which provider completes the patient's initial assessment is governed by law and hospital bylaws. It will vary by site. LBBS includes patients who complete the triage process. LBBS patients may or may not have received initial treatment and/or diagnostics.</p> |
| lbbs_non_intake_hours    | <p><b>Overall left before being seen (LBBS) rates (in %) outside of new front end process hours</b><br/> <i>Total number of patients who leave the ED before examination by a physician/APRN/PA, divided by the total number of patients who presented to the same ED during a defined time period. Which provider completes the patient's initial assessment is governed by law and hospital bylaws. It will vary by site. LBBS includes patients who</i></p>                                                                                                                        | <p>text (number, Min: 0, Max: 100)<br/>         Field Annotation: Total number of patients who leave the ED before examination by a physician/APRN/PA, divided by the total number of patients who presented to the same ED during a defined time period. Which provider completes the patient's initial assessment is governed by law and hospital bylaws. It will vary by site. LBBS includes patients who complete the triage process. LBBS patients may or may not have received initial treatment and/or diagnostics.</p> |

|                            |                                                                                                                                                                                                                                                |                       |
|----------------------------|------------------------------------------------------------------------------------------------------------------------------------------------------------------------------------------------------------------------------------------------|-----------------------|
|                            | <i>complete the triage process. LBBS patients may or may not have received initial treatment and/or diagnostics.</i>                                                                                                                           |                       |
| daily_census_pre           | Median ED daily census prior to new front end process<br><i>Median number of patients arriving to the ED in a 24-hour period</i>                                                                                                               | text (number, Min: 0) |
| daily_census_post          | Median ED daily census after new front end process<br><i>Median number of patients arriving to the ED in a 24-hour period</i>                                                                                                                  | text (number, Min: 0) |
| daily_boarding_pre         | Median number of daily boarding hours PRIOR to new front end process<br><i>First documented date and time of the disposition to admit the patient from the ED to documented date and time of the patient's physical departure from the ED.</i> | text (number, Min: 0) |
| daily_boarding_post        | Median number of daily boarding hours AFTER new front end process<br><i>First documented date and time of the disposition to admit the patient from the ED to documented date and time of the patient's physical departure from the ED.</i>    | text (number, Min: 0) |
| diversion_hours_pre        | Median number of monthly ED EMS diversion hours prior to new front end process                                                                                                                                                                 | text (number, Min: 0) |
| diversion_hours_post       | Median number of monthly ED EMS diversion hours after new front end process                                                                                                                                                                    | text (number, Min: 0) |
| barriers_to_implementation | What were the biggest barriers or change management struggles in implementing the new front end process?                                                                                                                                       | notes                 |



|                                                                                    |                                                                                                                                                              |                                                                                                                                                                     |   |            |   |            |   |          |
|------------------------------------------------------------------------------------|--------------------------------------------------------------------------------------------------------------------------------------------------------------|---------------------------------------------------------------------------------------------------------------------------------------------------------------------|---|------------|---|------------|---|----------|
| successful_changes                                                                 | What were your biggest successes in implementing the new front end process?                                                                                  | notes                                                                                                                                                               |   |            |   |            |   |          |
| comments                                                                           | Section Header: <i>Comments and Survey Submission</i><br>Please leave any other thoughts or comments below. Thank you for your participation in this survey! | notes                                                                                                                                                               |   |            |   |            |   |          |
| permission_to_acknowledge                                                          | May we acknowledge your contribution in any publications arising from this data?                                                                             | yesno, Required<br><table border="1"> <tr> <td>1</td> <td>Yes</td> </tr> <tr> <td>0</td> <td>No</td> </tr> </table>                                                 | 1 | Yes        | 0 | No         |   |          |
| 1                                                                                  | Yes                                                                                                                                                          |                                                                                                                                                                     |   |            |   |            |   |          |
| 0                                                                                  | No                                                                                                                                                           |                                                                                                                                                                     |   |            |   |            |   |          |
| acknowledgement_names<br>Show the field ONLY if: [permission_to_acknowledge] = '1' | Please list any contributing team members to be acknowledged                                                                                                 | notes, Identifier                                                                                                                                                   |   |            |   |            |   |          |
| intake_survey_complete                                                             | Section Header: <i>Form Status</i><br>Complete?                                                                                                              | dropdown<br><table border="1"> <tr> <td>0</td> <td>Incomplete</td> </tr> <tr> <td>1</td> <td>Unverified</td> </tr> <tr> <td>2</td> <td>Complete</td> </tr> </table> | 0 | Incomplete | 1 | Unverified | 2 | Complete |
| 0                                                                                  | Incomplete                                                                                                                                                   |                                                                                                                                                                     |   |            |   |            |   |          |
| 1                                                                                  | Unverified                                                                                                                                                   |                                                                                                                                                                     |   |            |   |            |   |          |
| 2                                                                                  | Complete                                                                                                                                                     |                                                                                                                                                                     |   |            |   |            |   |          |

**Table S1.** Qualitative descriptions of front-end treatment areas

|                                                                                                                                                                                                                                           |
|-------------------------------------------------------------------------------------------------------------------------------------------------------------------------------------------------------------------------------------------|
| Upright treatment spaces separated by a wall from the waiting room and dividers between patients                                                                                                                                          |
| Split flow model moves patients back to a care area so only patients who must wait get workup by protocol                                                                                                                                 |
| During Front End Process hours, two front rooms are used for physician triage and the back four rooms are used for lower acuity patients for treatment and discharge and processing orders for patients who will be roomed in the main ED |
| Chairs                                                                                                                                                                                                                                    |
| Recliner chair                                                                                                                                                                                                                            |
| Small rooms with recliners, same space as nursing triage. Additional room with 4 to 5 recliners for initiation of protocols                                                                                                               |
| Table, chair, vital signs monitors, EMR                                                                                                                                                                                                   |

ED = emergency department, EMR = electronic medical record

**Table S2.** Qualitative descriptions of front-end surge plans

|                                                                                                                                                                                                                                                                                                                                                                                                                                                                            |
|----------------------------------------------------------------------------------------------------------------------------------------------------------------------------------------------------------------------------------------------------------------------------------------------------------------------------------------------------------------------------------------------------------------------------------------------------------------------------|
| Our frontend process is the surge plan, otherwise it is direct bedding                                                                                                                                                                                                                                                                                                                                                                                                     |
| Yes, Charge nurse/Clinical coordinator, will send additional RNS to intake if intake wait times are longer than 30 min.                                                                                                                                                                                                                                                                                                                                                    |
| Yes. If surge, CareSTART doctor discusses with charge nurse needs/resources to remove bottlenecks.<br>We sometimes bring back an additional resident/faculty to do physician intake. Hallways are utilized.<br>We try not to open 'triage'                                                                                                                                                                                                                                 |
| Another provider steps up                                                                                                                                                                                                                                                                                                                                                                                                                                                  |
| Yes, once we get to 5 or more waiting for registration/triage, we call for assistance from registration personnel and additional RN to triage; in addition, rolling out artificial intelligence project that predicts surges 2 hours in advance so that providers, clinical staff, EVS, transportation, house supervisors, central bed management, lab and imaging can help resource to clear out current patients and accelerate patients arriving through the ED process |
| Our ED Charge nurse will survey the department flow and modify ambulatory patient placement, depending on length of waiting in the Main ED vs SuperTrack.                                                                                                                                                                                                                                                                                                                  |
| Yes moving to the waiting room to initiate care.                                                                                                                                                                                                                                                                                                                                                                                                                           |

**Table S3.** Qualitative descriptions of barriers to implementation

|                                                                                                                                                                                                                                                                                                                                                                                                                                                                |
|----------------------------------------------------------------------------------------------------------------------------------------------------------------------------------------------------------------------------------------------------------------------------------------------------------------------------------------------------------------------------------------------------------------------------------------------------------------|
| <p>We are remodeling so LOS data are in flux. The physical space not well designed for the new split flow process but helped us know what we needed, currently in construction build for new care model. As with many places, our process was an evolution of various forms of frontend redesign. starting with a provider in triage and evolving to care team in triage and ultimately a split flow model of care in which we found the greatest success.</p> |
| <p>1) Buy in from nursing to not open triage during surges, 2) Not loosing 'track' of patients in our internal waiting once studies back but still no room in main ED, 3) Help patients understand the process ('feel like they are on conveyor belt')</p>                                                                                                                                                                                                     |
| <p>Boarding</p>                                                                                                                                                                                                                                                                                                                                                                                                                                                |
| <p>Space, boarding, and nursing staffing</p>                                                                                                                                                                                                                                                                                                                                                                                                                   |
| <p>Lack of manpower to perform the orders e.g. ECG and lab tests. Limited ability of nurses to order tests or medications because of licensing restrictions. At peak hours there can be more than 10 people waiting for triage and the triage times go up to 60 minutes. There are only 4 triage rooms. There is only one ECG room which is a choke point as well.</p>                                                                                         |
| <p>1. physical space - we only have 2 triage rooms, so we made the front end happen in waiting room 2. funding for additional nurses. Had to get hospital approval</p>                                                                                                                                                                                                                                                                                         |
| <p>Physical plant layout, sustaining provider presence in intake area</p>                                                                                                                                                                                                                                                                                                                                                                                      |
